# Supplementary material for: Adsorption of sucrose on zeolites
Source: Royal Society of Chemistry journal article supplement (doi:10.1039/c5gc02832a), 2016-01-01
Supplement: c5gc02832a1.pdf [file c5gc02832a1.pdf]

## Appendix

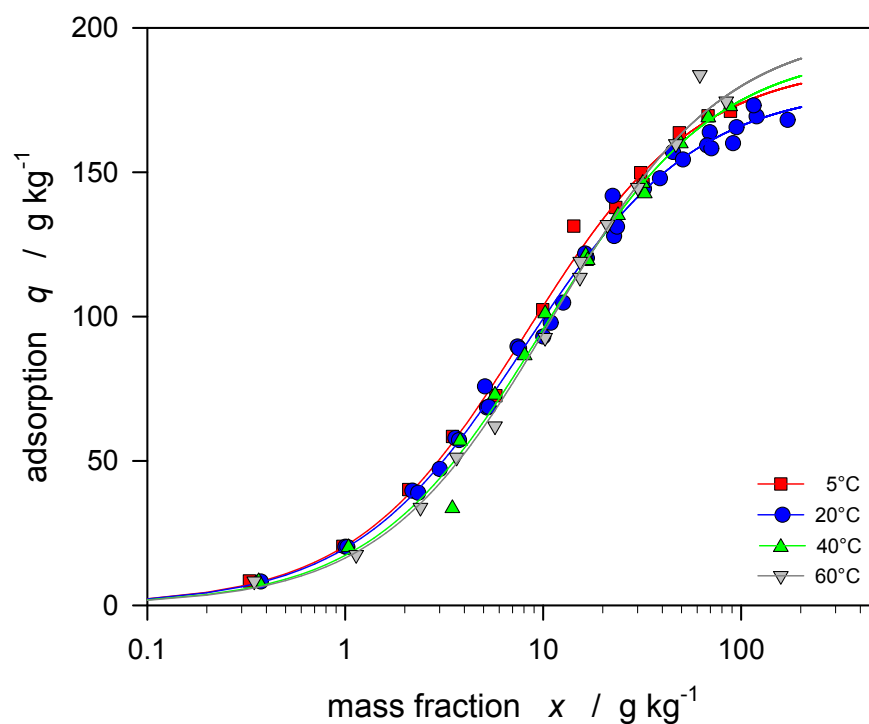

Figure A1: Langmuir adsorption isotherms for aqueous sucrose on DAY 130

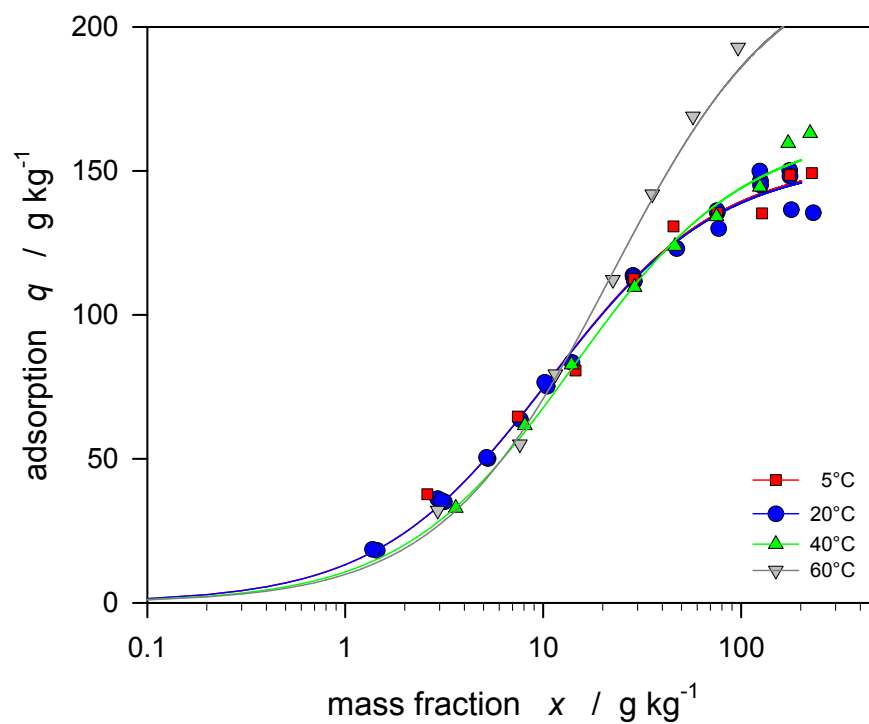

Figure A2: Langmuir adsorption isotherms for aqueous sucrose on DAY 55

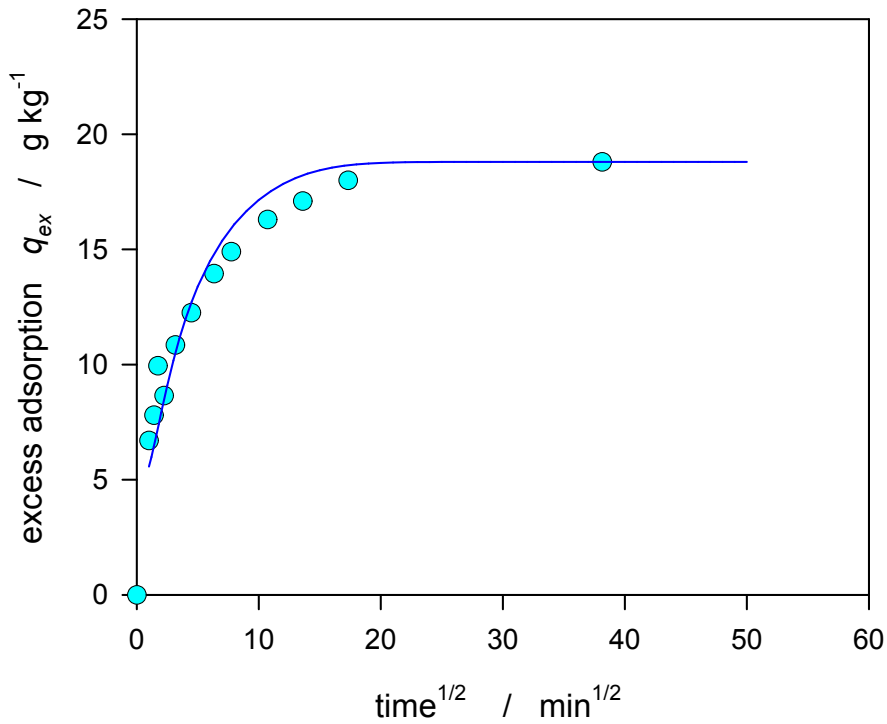

Figure A3: Rate of sucrose adsorption from water (0.1M phosphate buffer pH 7.0) at extrudates of DAY 130 (2 mm diameter, 3-4 mm length). Calculation of the up-take curve by assuming spherical particles of 2 mm diameter.  $D_{eff} = 1.8 \cdot 10^{-11} \text{ m}^2 \text{ s}^{-1}$ .

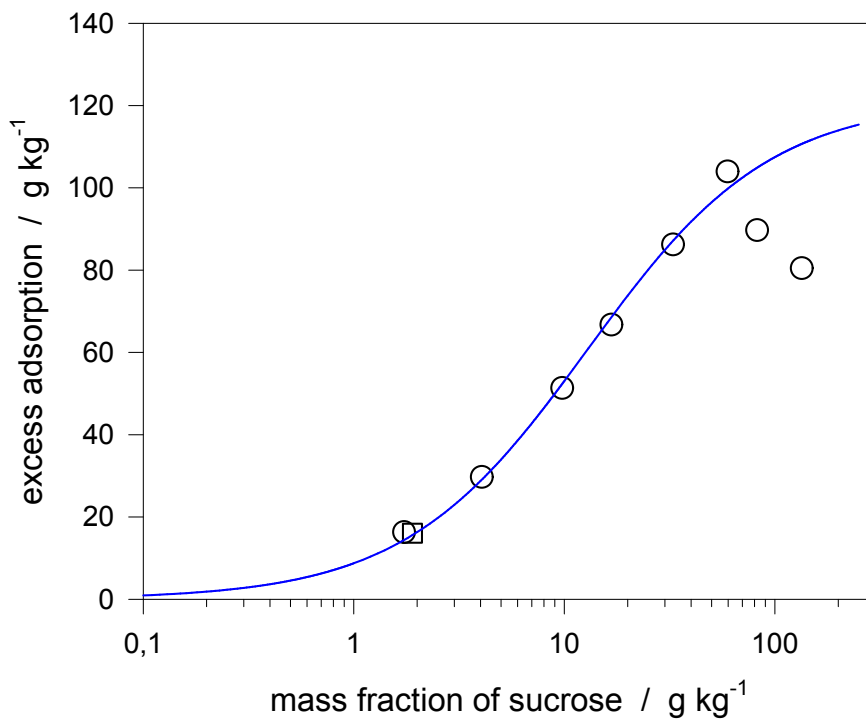

Figure A4: Langmuir adsorption of sucrose from aqueous solution (0.1M phosphate buffer pH 7.0) on extrudates of DAY (2 mm diameter, 3-4 mm length).  $k = 9.4 \text{ L kg}^{-1}$ ,  $q_{s,ex} = 123 \text{ g kg}^{-1}$

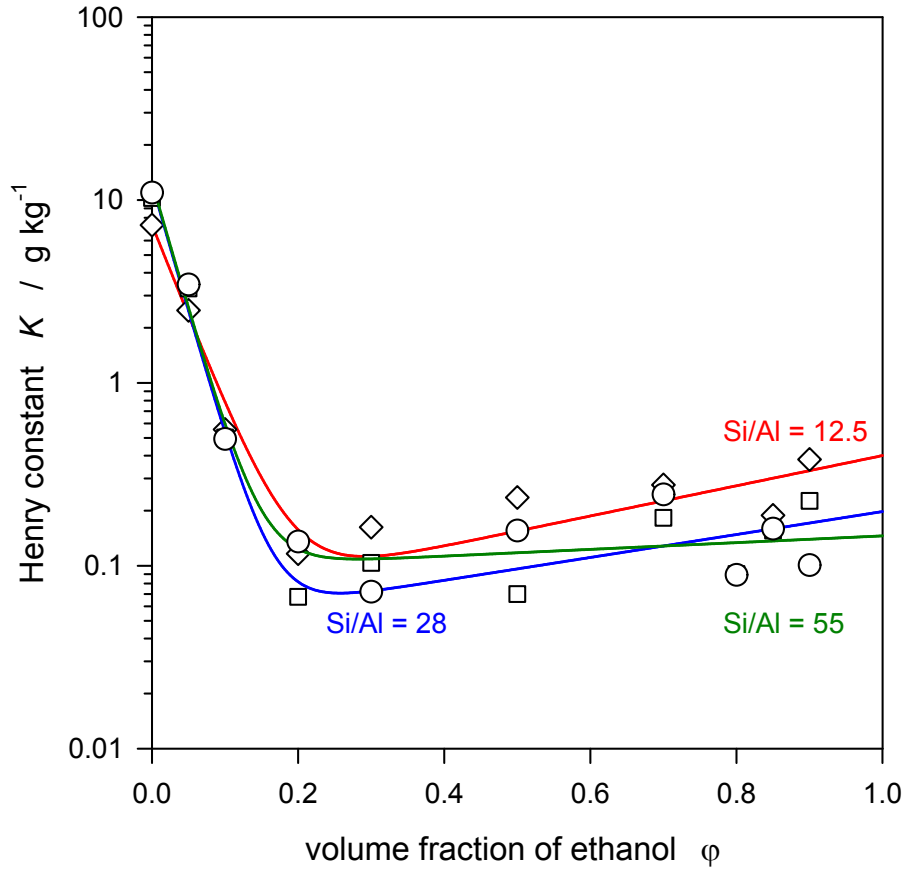

Figure A5: Henry constant of the adsorption of sucrose from ethanol-water mixtures on DAY 12.5, DAY 28, and DAY 55 at 20°C. Modeling according to equation (13,14)

Table A1: Parameters for the modeling of the  $K$ -values for the adsorption from aqueous ethanol solvent (see equations (13) and (14))

| Si/Al | $a_1$ | $b_1$ | $a_2$ | $b_2$  |
|-------|-------|-------|-------|--------|
| 2.8   | 23.6  | -5.15 | 18000 | -25.5  |
| 7.6   | 4.31  | -23.4 | 0.277 | -1.36  |
| 12.5  | 7.26  | -23.2 | 0.400 | -1.90  |
| 28    | 12.2  | -32.2 | 0.196 | -1.46  |
| 55    | 12.4  | -32.2 | 0.146 | -0.425 |
| 130   | 21.9  | -35.3 | 0.014 | -0.140 |
